# Supplementary material for: Trichoderma spp. from Pine Bark and Pine Bark Extracts: Potent Biocontrol Agents against Botryosphaeriaceae
Source: MDPI journal article supplement (doi:10.3390/f12121731), 2021-12-08
Supplement: s1 [file s1]

a)

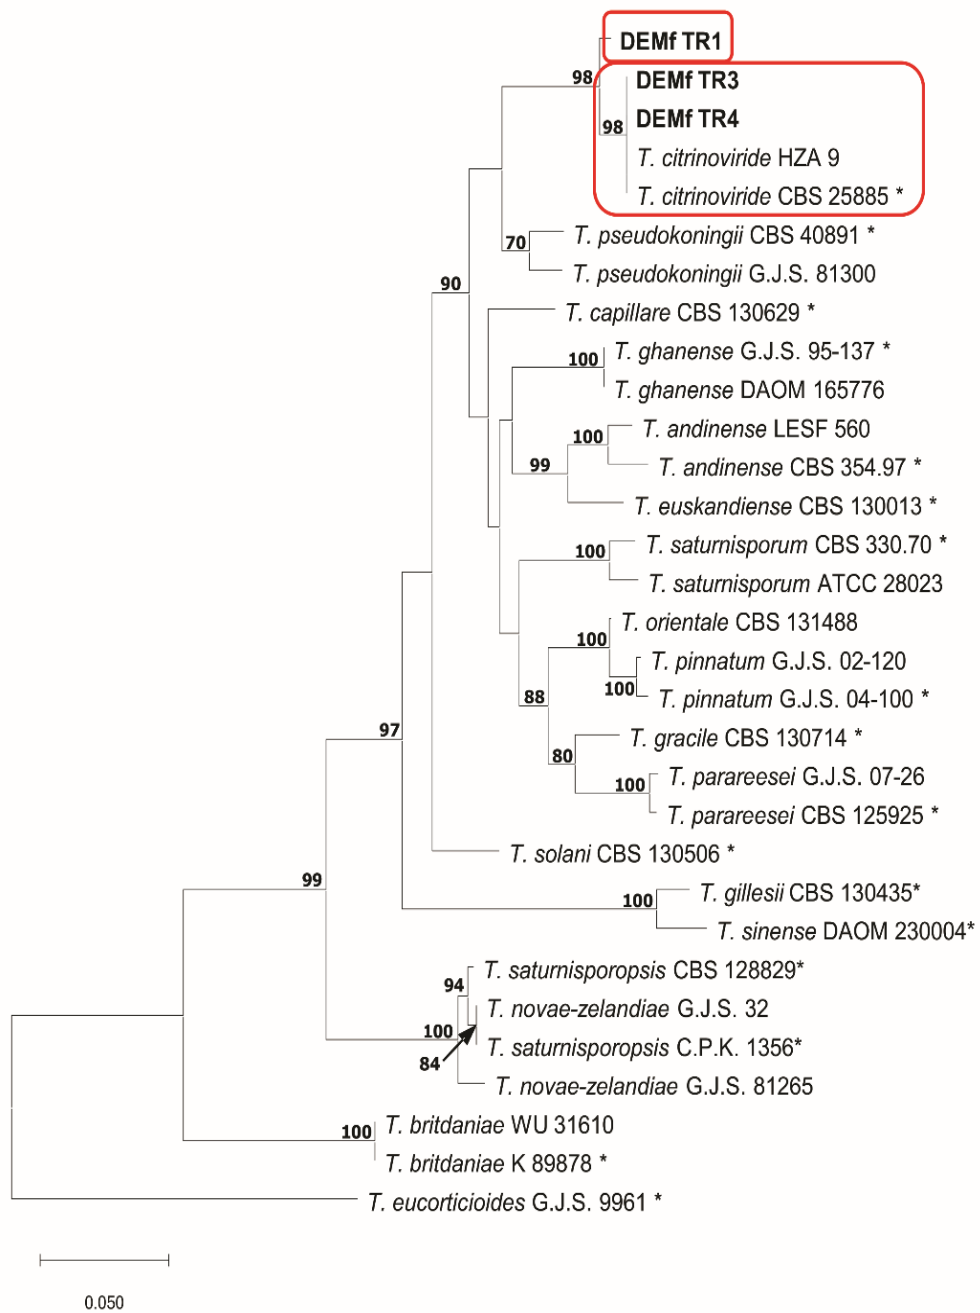

b)

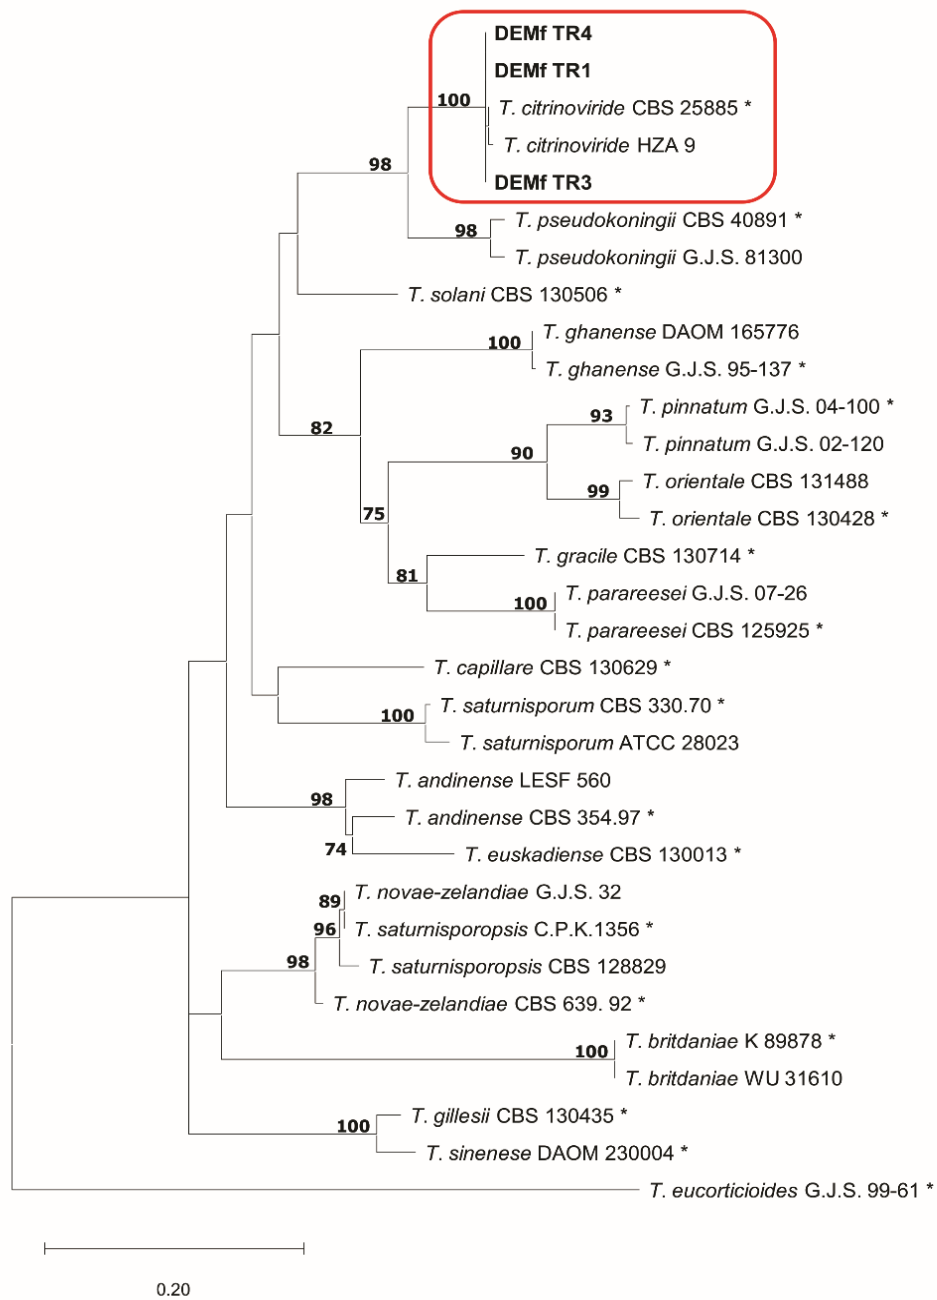

c)

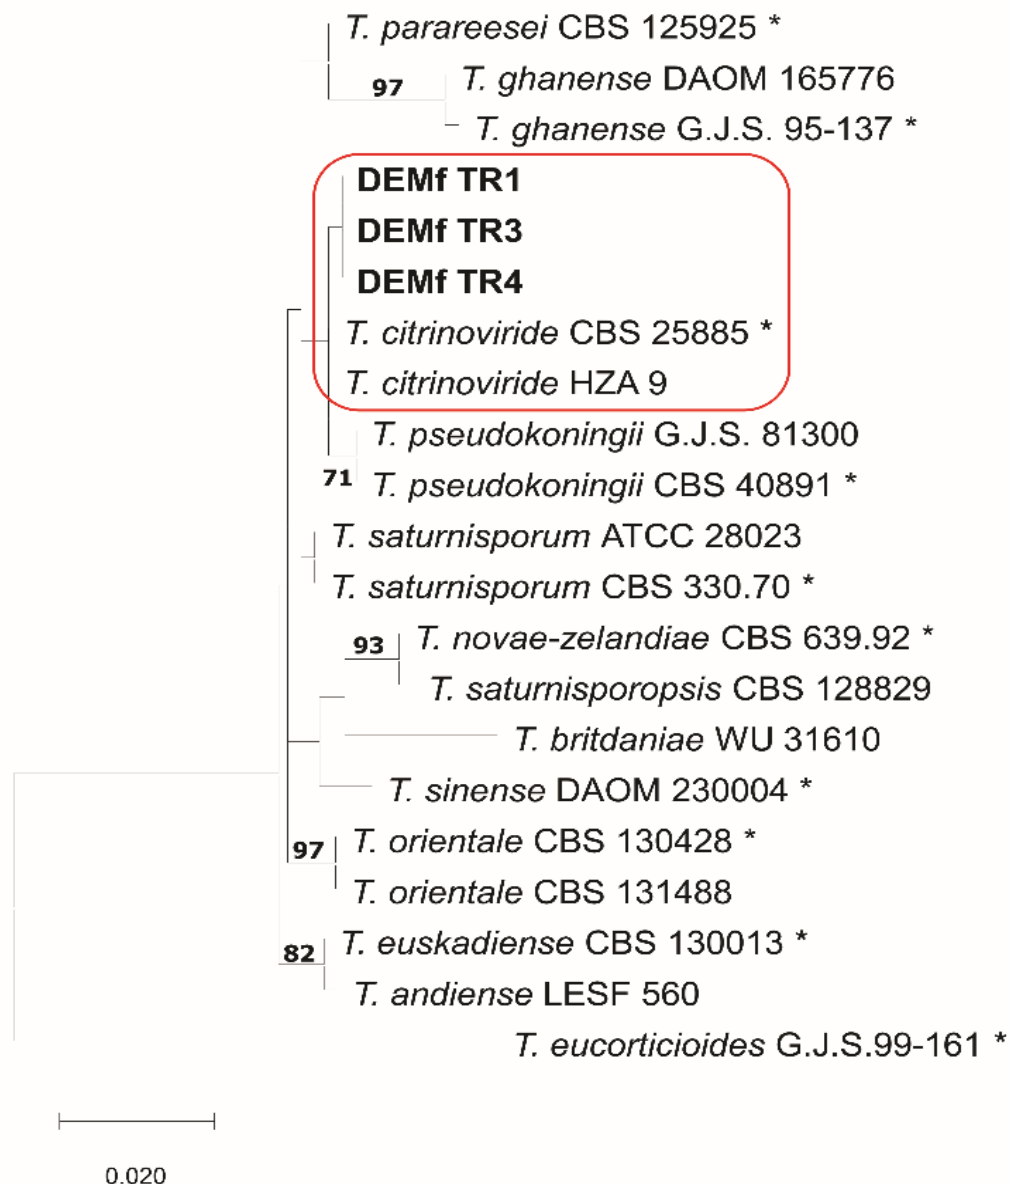

**Figure S1.** Phylogenetic trees generated from Maximum likelihood (ML) analyses based on a single gene alignment of a) RPB2, b) TEF 1- $\alpha$ , and c) ITS sequence data. ML bootstrap support values greater than 70% are indicated at the tree nodes (ML). The type strains are marked with an asterisk. Isolates sequenced in this study are given in bold and highlighted. *Trichoderma euorticioides* (G.J.S. 99-161) was included as an outgroup. Scale bar indicates expected number of substitutions per site.

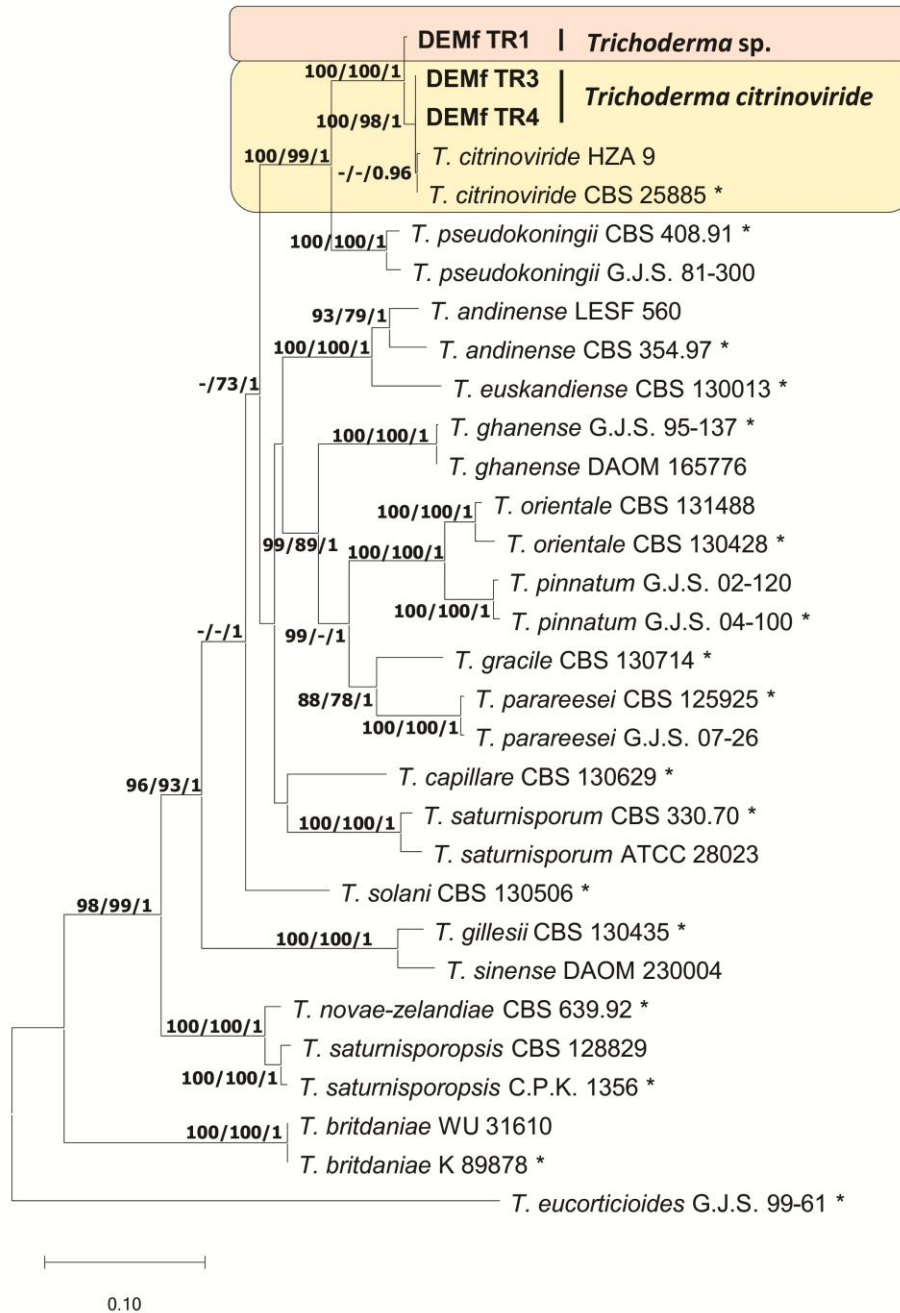

**Figure S2.** Phylogenetic tree generated from a maximum likelihood analysis (ML) based on a concatenated alignment of *tef* 1- $\alpha$  and *RPB2* sequence data showing the position of *Trichoderma citrinoviride* in relation to its closely related species belonging to the *Longibranchiatum* clade. ML and maximum parsimony (MP) bootstrap support values greater than 70% and Bayesian posterior probability values (PP) greater than 0.95 are indicated at the tree nodes (ML/MP/PP). The type strains are marked with an asterisk and isolates sequenced in this study are shown in bold. *T. eucorticioides* G.J.S. 99-61 (clade *Hypocreanum*) is included as an outgroup. Scale bar indicates expected number of substitutions per site.

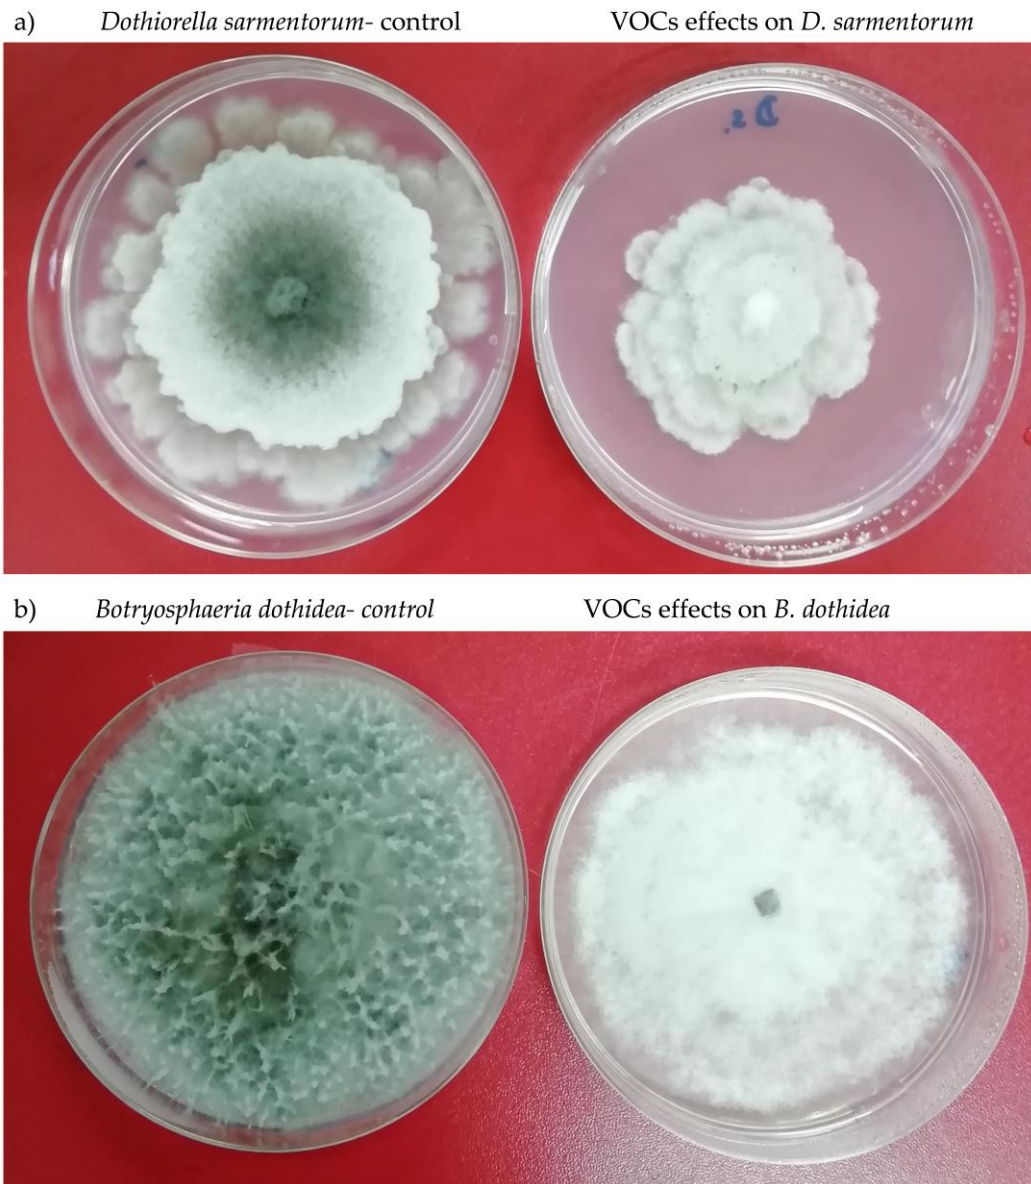

**Figure S3.** Effects of VOCs of *Trichoderma citrinoviride* DEMf TR4 on mycelial growth of *D. sarmentorum* (a) and *B. dothidea* (b).

**Table S1.** Sequences used in the phylogenetic analyses.

| Isolate no. <sup>1,2</sup> | Identity                         | Country     | GenBank accession no. <sup>3,4</sup> |                 |          |
|----------------------------|----------------------------------|-------------|--------------------------------------|-----------------|----------|
|                            |                                  |             | ITS                                  | tef 1- $\alpha$ | RPB2     |
| DEMf TR1                   | <i>Trichoderma</i> sp.           | Serbia      | OK384601                             | OK422203        | OK422200 |
| DEMf TR3                   | <i>Trichoderma citrinoviride</i> | Serbia      | OK384602                             | OK422204        | OK422201 |
| DEMf TR4                   | <i>T. citrinoviride</i>          | Serbia      | OK384603                             | OK422205        | OK422202 |
| CBS 258.85                 | <i>T. citrinoviride</i>          | USA         | MH861877                             | AY865637        | KJ842210 |
| HZA 9                      | <i>T. citrinoviride</i>          | China       | MH624144                             | MK850831        | MK962804 |
| CBS 408.91                 | <i>T. pseudokoningii</i>         | Australia   | MH862258                             | JN175588        | JN175535 |
| G.J.S. 81-300              | <i>T. pseudokoningii</i>         | New Zealand | Z82908                               | AY937429        | JN175534 |
| CBS 330.70                 | <i>T. saturnisporum</i>          | Italy       | NR_103704                            | EU280044        | DQ087243 |
| ATCC 28023                 | <i>T. saturnisporum</i>          | USA         | X93977                               | JN388897        | JN175524 |
| LESF 560                   | <i>T. andinense</i>              | Brazil      | KT278909                             | KT279038        | KT278980 |
| CBS 354.97                 | <i>T. andinense</i>              | Venezuela   | -                                    | AY956321        | JN175531 |
| CBS 130013                 | <i>T. euskandiense</i>           | Spain       | MH865626                             | KJ665492        | KJ665269 |
| DAOM 165776                | <i>T. ghanense</i>               | Ghana       | Z48936                               | JN175610        | JN175560 |
| G.J.S. 95-137              | <i>T. ghanense</i>               | Ghana       | Z69588                               | AY937423        | JN175559 |
| CBS 125925                 | <i>T. parareesei</i>             | Argentina   | MH863773                             | GQ354353        | HM182963 |
| G.J.S. 07-26               | <i>T. parareesei</i>             | Ghana       | -                                    | GQ354373        | HM182966 |
| CBS 130714                 | <i>T. gracile</i>                | Malaysia    | -                                    | JN175598        | JN175547 |
| CBS 131488                 | <i>T. orientale</i>              | Spain       | JQ685873                             | JQ685868        | JQ685884 |
| CBS 130428                 | <i>T. orientale</i>              | China       | EU401550                             | EU401550        | -        |
| G.J.S. 02-120              | <i>T. pinnatum</i>               | Vietnam     | -                                    | JN175572        | JN175516 |
| G.J.S. 04-100              | <i>T. pinnatum</i>               | Vietnam     | -                                    | JN175571        | JN175515 |
| CBS 130629                 | <i>T. capillare</i>              | Hungary     | -                                    | JN182283        | JN182312 |
| CBS 130506                 | <i>T. solani</i>                 | Mexico      | -                                    | JN175597        | JN175546 |
| CBS 130435                 | <i>T. gillesii</i>               | France      | -                                    | JN175583        | JN175527 |
| DAOM 230004                | <i>T. sinense</i>                | Taiwan      | -                                    | AY750889        | JN175528 |
| C.P.K. 1356                | <i>T. saturnisporopsis</i>       | USA         | -                                    | JN182281        | DQ857348 |
| CBS 128829                 | <i>T. saturnisporopsis</i>       | Italy       | JQ685874                             | JQ685874        | JQ685885 |
| CBS 639.92                 | <i>T. novae-zelandiae</i>        | New Zealand | DQ083019                             | AY937448        | JN133563 |
| WU 31610                   | <i>T. britdaniae</i>             | Denmark     | NR_138454                            | JQ685866        | JQ685880 |
| K 89878                    | <i>T. britdaniae</i>             | UK: England | -                                    | JQ685865        | JQ685881 |
| G.J.S. 99-61               | <i>T. eucorticoides</i>          | Costa Rica  | NR_134431                            | DQ835502        | DQ835518 |

<sup>1</sup> Ex-type or ex-epitype strains are shown in italic.

<sup>2</sup> Strains sequenced in this study are shown in bold.

<sup>3</sup> ITS: Internal Transcribed Spacer; tef 1- $\alpha$ : partial translation elongation factor 1-alpha gene; RPB2: RNA polymerase II gene.

<sup>4</sup> Dashes indicate that the corresponding sequence was not available from GenBank.

ATCC: American Type Culture Collection, USA; CBS: Culture Collection of the Westerdijk Fungal Biodiversity Institute, Utrecht, the Netherlands; culture collection of Christian P. Kubicek, Institute of Chemical Engineering, Vienna University of Technology, Vienna, Austria; DAOM: Canadian Collection of Fungal Cultures, Ottawa, Canada; DEMf: Collection of Microorganisms of the Department of Ecological Microbiology: Fungi (University of Belgrade, Faculty of Agriculture); G.J.S.: Culture Collection of G.J. Samuels, Systematic Botany and Mycology Laboratory, US Dept of Agriculture, Beltsville, MD, USA.

**Table S2.** Nucleotide differences between *Trichoderma* sp. and its closest phylogenetic relative *T. citrinoviride*.

| Isolates                            | Locus |                 |    |     |     |      |     |     |     |     |     |     |     |     |     |     |
|-------------------------------------|-------|-----------------|----|-----|-----|------|-----|-----|-----|-----|-----|-----|-----|-----|-----|-----|
|                                     | ITS   | tef 1- $\alpha$ |    |     |     | RPB2 |     |     |     |     |     |     |     |     |     |     |
|                                     | 595   | 49              | 68 | 479 | 285 | 294  | 372 | 393 | 426 | 447 | 733 | 750 | 792 | 801 | 804 | 855 |
| <i>Trichoderma</i> sp. DEMf TR1     | -     | A               | T  | G   | A   | T    | T   | T   | A   | A   | G   | T   | C   | G   | C   | A   |
| <i>T. citrinoviride</i> DEMf TR3    | -     | A               | T  | G   | G   | C    | C   | A   | G   | G   | C   | C   | T   | A   | T   | G   |
| <i>T. citrinoviride</i> DEMf TR4    | -     | A               | T  | G   | G   | C    | C   | A   | G   | G   | C   | C   | T   | A   | T   | G   |
| <i>T. citrinoviride</i> CBS 25885 * | T     | A               | C  | G   | G   | C    | C   | A   | G   | G   | C   | C   | T   | A   | T   | G   |
| <i>T. citrinoviride</i> HZA 9       | T     | C               | C  | C   | G   | C    | C   | A   | G   | G   | C   | C   | T   | A   | T   | G   |

Shared polymorphisms between *Trichoderma* sp. and *T. citrinoviride* are highlighted in grey, whereas fixed polymorphisms at which *Trichoderma* sp. differs from *T. citrinoviride* are highlighted in orange. The *T. citrinoviride* type strain is marked with an asterisk.
